# Supplementary material
Source: PubMed Central journal article supplement (PMC4069916)
Supplement: ijcep0007-2068-f5.pdf [file ijcep0007-2068-f5.pdf]

## Rictor is a prognostic factor for endometrial carcinoma

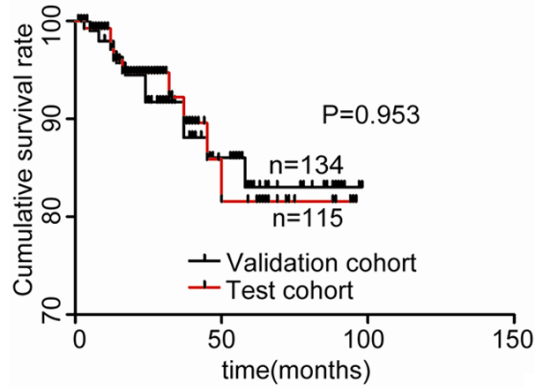

**Supplementary Figure 1.** Comparisons of OS between in the test and validation cohorts. (P=0.953).

**Supplementary Table 1.** Background disposition and clinical characteristics of endometrial cancer in test and validation cohort

|                                                                      | No. (%)             |                           | P value |
|----------------------------------------------------------------------|---------------------|---------------------------|---------|
|                                                                      | Test cohort (n=134) | Validation cohort (n=115) |         |
| Pregnancy                                                            |                     |                           |         |
| No                                                                   | 7 (5.2%)            | 6 (5.2%)                  | 0.998   |
| Yes                                                                  | 127 (94.8%)         | 109 (94.8%)               |         |
| Pathological type                                                    |                     |                           |         |
| Adenocarcinoma                                                       | 121 (90.3%)         | 102 (88.7%)               | 0.680   |
| Squamous carcinoma, papillary serous carcinoma, clear cell carcinoma | 13 (9.7%)           | 13 (11.3%)                |         |
| Stage                                                                |                     |                           |         |
| I                                                                    | 115 (85.8%)         | 100 (87%)                 | 0.789   |
| II                                                                   | 11 (8.2%)           | 9 (7.8%)                  |         |
| III, IV                                                              | 8 (6%)              | 6 (5.2%)                  |         |
| Grade                                                                |                     |                           |         |
| G1                                                                   | 77 (57.5%)          | 69 (60%)                  | 0.776   |
| G2                                                                   | 42 (31.3%)          | 32 (27.8%)                |         |
| G3                                                                   | 15 (11.2%)          | 14 (12.2%)                |         |
| Vascular invasion                                                    |                     |                           |         |
| No                                                                   | 126 (94%)           | 109 (94.8%)               | 0.797   |
| Yes                                                                  | 8 (6%)              | 6 (5.2%)                  |         |
| Lymphatic metastasis                                                 |                     |                           |         |
| No                                                                   | 127 (94.8%)         | 110 (95.7%)               | 0.748   |
| Yes                                                                  | 7 (5.2%)            | 5 (4.3%)                  |         |
| RICTOR                                                               |                     |                           |         |
| No                                                                   | 75 (56%)            | 65 (56.5%)                | 0.930   |
| Yes                                                                  | 59 (44%)            | 50 (43.5%)                |         |
